# Supplementary material for: Safety profile of EZH2 inhibitors for cancer: a systematic review and meta-analysis
Source: PeerJ journal article supplement (doi:10.7717/peerj.18871), 2025-01-27
Supplement: SuppFigsTables.zip [file SuppFigsTables.zip]

## Sheet: Table S2
	Table S2. Clinical studies of EZH2 inhibitors in hematological and solid tumors
	Author	Year	Trial name/ID	Study type	Phase	Cancer type	Agent	Arms and Interventions	Start (date)	Status (Completion date)
	-	-	NCT05965505	Single arm	Phase 1	R/R NHL	AXT-1003	AXT-1003	2023-08-11	Ongoing
	Oaknin	2024	NCT04104776	Single arm	Phase 1/2	Advanced HM and solid tumors	CPI-0209	CPI-0209	2019-09-18	Ongoing
	-	-	NCT05942300	Single arm	Phase 1	Platinum sensitive recurrent ovarian cancer	CPI-0209	CPI-0209 + carboplatin	2024-01-10	Ongoing
	-	-	NCT05944562	Single arm	Phase 1	Mycosis fungoides and sézary syndrome	CPI-0209	CPI-0209	2024-01-09	Ongoing
	-	-	NCT03480646	RCT (phase 2)	Phase 1/2	Metastatic CRPC	CPI-1205	Arm 1: CPI-1205 + CPI-1205 Arm 2: CPI-1205 + Abiraterone/Prednisone	2017-11-15	NA
	Harb	2018	NCT02395601	Single arm	Phase 1	B-Cell Lymphomas	CPI-1205	CPI-1205	2015-03-01	Completed (2018/12/31)
	-	-	NCT03525795	Single arm	Phase 1	Advanced solid tumors	CPI-1205	CPI-1205 + Ipilimumab	2017-12-14	Completed (2019/6/12)
	Yap	2019	NCT02082977	Single arm	Phase 1	Hematologic and solid tumors	GSK2816126	GSK2816126	2014-04-24	Terminated
	Calvo	2023	NCT03460977	Single arm	Phase 1	R/R CRPC/SCLC/FL	PF-06821497	PF-06821497	2018-04-17	Ongoing
	-	-	NCT05896046	RCT (phase 2)	Phase 1/2	R/R HL	SHR2554	Arm 1: SHR2554+ SHR1701 Arm 2: SHR-1701	2023-06-14	Ongoing
	-	-	NCT06122389	RCT	Phase 3	R/R PTCL	SHR2554	SHR2554 + Chidamide	2024-02-05	Ongoing
	Song	2022	NCT03603951	Single arm	Phase 1	R/R mature lymphoid neoplasms	SHR2554	SHR2554	2018-08-14	Ongoing
	Zhu	2024	NCT04355858	Umbrella study	Phase 2	Luminal advanced breast cancer	SHR2554	Seven precision treatment cohorts	2020-05-01	Ongoing
	-	-	NCT03741712a	Non-randomized	Phase 1/2	Metastatic CRPC	SHR2554	Arm 1: SHR2554 + SHR3680 Arm 2: SHR2554	2018-11-20	Terminated
	Song	2022	NCT03603951	Single arm	Phase 1	R/R mature lymphoid neoplasms	SHR2554	SHR2554	2018-08-14	Ongoing
	-	-	NCT06368167	Single arm	Phase 2	R/R FL	SHR2554	SHR2554	2024-04-01	Ongoing
	-	-	NCT06173999	Single arm	Phase 1b/2	PTCL	SHR2554	SHR2554/CHOP or SHR2554/CHOEP	2023-12-22	Ongoing
	Feng	2023	NCT04407741	RCT (phase 2)	Phase 1/2	Solid tumors and BCL	SHR2554	Arm 1: SHR2554+SHR1701 Arm 2: SHR2554	2020-09-01	Ongoing
	John P. Leonard	2020	-	RCT	Phase 1b/3	R/R FL	Tazemetostat	Arm 1: Lenalidomide + Rituximab + Tazemetostat Arm 2: Lenalidomide + Rituximab	-	NA
	-	-	NCT04557956	RCT (phase 2)	Phase 1/2	BRAF-mutated MM	Tazemetostat	Arm 1: tazemetostat Arm 2: Dabrafenib + Trametinib + Tazemetostat	2021-08-19	Ongoing
	Salles	2023	NCT04224493	RCT (phase 3)	Phase 1b/3	R/R FL	Tazemetostat	Arm 1: Lenalidomide + Rituximab + Tazemetostat Arm 2: Lenalidomide + Rituximab	2020-06-11	Ongoing
	Morschhauser	2020	NCT01897571	Single arm	Phase 2	R/R FL	Tazemetostat	Tazemetostat	2013-06-13	Completed (2021/12/1)
	Morschhauser	2017	NCT01897571	Single arm	Phase 1	R/R DLBCL or solid tumors	Tazemetostat	Tazemetostat	2013-06-13	Completed (2021/12/1)
	Gounder	2020	NCT02601950	Single arm	Phase 2	INI1-negative tumors or R/R synovial sarcoma	Tazemetostat	Tazemetostat	2015-12-22	Completed (2024/2/26)
	Chawla	2021	NCT04204941	RCT	Phase 1b/3	Advanced epithelioid sarcoma	Tazemetostat	Arm 1: tazemetostat + doxorubicin Arm 2: placebo + doxorubicin	2019-12-19	Ongoing
	Chi	2023	NCT03213665	Single arm	Phase 2	Tumors with alterations in EZH2 or SWI/SNF complex	Tazemetostat	Tazemetostat	2017-12-13	Ongoing
	Abida	2021	NCT04179864	RCT (phase 2)	Phase 1b/2	Metastatic CRPC	Tazemetostat	Arm 1: tazemetostat + enzalutamide Arm 2: enzalutamide	2019-11-18	Ongoing
	Morschhauser	2021	NCT02875548b	Rollover Study	-	Patients who received 2 years of therapy	Tazemetostat	Tazemetostat monotherapy or combination therapy	2016-08-30	Ongoing
	Zauderer	2022	NCT02860286	Single arm	Phase 2	R/R malignant mesothelioma	Tazemetostat	Tazemetostat	2016-07-01	Completed (2019/5/30)
	-	-	NCT05604417c	Single arm	Phase 1/2	R/R FL	Tazemetostat	Tazemetostat + zandelisib	2023-01-01	Withdrawn
	Sarkozy	2020	NCT02889523	Single arm	Phase 1b/2	DLBCL or FL	Tazemetostat	Tazemetostat + R-CHOP	2016-10-01	Ongoing
	-	-	NCT06068881	Single arm	Phase 2	R/R FL lacking the EZH2 gain-of-function mutation	Tazemetostat	Tazemetostat	Not yet recruiting	-
	-	-	NCT05467748	Single arm	Phase 1b/2	Advanced NSCLC	Tazemetostat	Tazemetostat + PD-1 Blockade	Not yet recruiting	-
	-	-	NCT04762160	Single arm	Phase 2	R/R FL	Tazemetostat	Tazemetostat + Rituximab	2020-12-15	TERMINATED
	-	-	NCT03456726	Single arm	Phase 2	R/R B-cell NHL with EZH2 gene mutation	Tazemetostat	Tazemetostat	2018-04-09	Completed (2021/12/17)
	-	-	NCT05467943	Single arm	Phase 2	R/R FL	Tazemetostat	Tazemetostat	2022-07-29	Ongoing
	-	-	NCT05023655	Single arm	Phase 2	Solid tumors harboring an ARID1A mutation	Tazemetostat	Tazemetostat	2022-01-06	Ongoing
	Abida	2021	NCT02601937	Single arm	Phase 1b	R/R INI1-negative tumors or synovial sarcoma	Tazemetostat	Tazemetostat	2016-01-07	Completed (2021/10/22)
	-	-	NCT05983965	Single arm	Phase 1	R/R PTCL	Tazemetostat	Tazemetostat	Not yet recruiting	-
	-	-	NCT05567679c	Single arm	Phase 1	Before prostatectomy in men with prostate cancer	Tazemetostat	Tazemetostat	2023-12-01	Withdrawn
	-	-	NCT05627245	Single arm	Phase 1	R/R lLymphoma	Tazemetostat	Tazemetostat + belinostat	2023-03-01	Ongoing
	-	-	NCT03010982d	Single arm	Phase 1	Advanced HM and solid tumors	Tazemetostat	Tazemetostat	2018-06-20	Completed (2019/1/8)
	Hussain	2024	NCT03854474	Single arm	Phase 1/2	Advanced urothelial carcinoma	Tazemetostat	Tazemetostat + pembrolizumab	2019-11-18	Ongoing
	-	-	NCT04917042	Single arm	Phase 2	R/R or metastatic peripheral nerve sheath tumor	Tazemetostat	Tazemetostat	2021-08-25	Ongoing
	-	-	NCT05551936	Single arm	Phase 1/2	High tumor burden FL	Tazemetostat	Tazemetostat + Rituximab + Bendamustine	2023-01-26	Ongoing
	-	-	NCT03217253c	Single arm	Phase 1	Solid tumors or BCL with liver dysfunction	Tazemetostat	Tazemetostat	2018-03-16	Withdrawn
	-	-	NCT05994235	Single arm	Phase 2	Untreated FL	Tazemetostat	Tazemetostat + mosunetuzumab	2023-11-01	Ongoing
	-	-	NCT05627232	Single arm	Phase 1	R/R AML	Tazemetostat	Tazemetostat + CPX-351	2023-08-28	Ongoing
	-	-	NCT05205252c	Open-label, multiple arm	Phase 1/2	R/R HM	Tazemetostat	Tazemetostat + various treatments	2021-12-22	Withdrawn
	Choudhury	2022	NCT04846478	Single arm	Phase 1a/b	Metastatic CRPC	Tazemetostat	Tazemetostat + Talazoparib	2021-06-28	Ongoing
	Munakata	2021	NCT03009344	Single arm	Phase 1	R/R B-cell NHL	Tazemetostat	Tazemetostat	2017-01-10	2020-06-17
	Palomba	2022	NCT02220842	Single arm	Phase 1b	R/R DLBCL	Tazemetostat	Tazemetostat + Atezolizumab + Obinutuzumab	2014-12-18	2020-01-21
	-	-	NCT05407441	Single arm	Phase 1/2	Children with INI1-Negative or SMARCA4-deficient tumors	Tazemetostat	Tazemetostat + Nivolumab + Ipilimumab	2023-08-10	Ongoing
	-	-	NCT04241835	Single arm	Phase 1	Moderate and severe hepatic impairment with advanced malignancies	Tazemetostat	Tazemetostat	2020-01-28	Ongoing
	Palmieri	2023	NCT04705818	Umbrella study	Phase 2	Solid tumors	Tazemetostat	Combining epigenetic and immune therapy	2021-07-23	Ongoing
	-	-	NCT05228158	Observational study	-	R/R FL with EZH2 gene mutation	Tazemetostat	Tazemetostat	2021-08-16	Ongoing
	-	-	NCT05934838	Single arm	Phase 1	B-cell lymphomas	Tazemetostat	Tazemetostat + CAR T cell therapy	2023-10-04	Ongoing
	-	-	NCT05713110	Single arm	Phase 2	R/R lymphoma	Tazemetostat	Tazemetostat + HMPL-689	2023-02-13	Ongoing
	Puram	2023	NCT04624113	Single arm	Phase 1	Pembrolizumab- or nivolumab-resistant R/R HNSCC	Tazemetostat	Tazemetostat + Pembrolizumab	2021-04-14	Terminated
	-	-	NCT05618366	Single arm	Phase 1	R/​R NHL	Tazemetostat	Tazemetostat + Venetoclax	2023-06-07	Ongoing
	-	-	NCT03348631	Single arm	Phase 2	Recurrent ovarian or endometrial cancer	Tazemetostat	Tazemetostat	2019-05-01	Ongoing
	-	-	NCT05152459c	Single arm	Phase 1/2	R/R FL	Tazemetostat	Tazemetostat + Umbralisib + Ublituximab	2023-05-01	Withdrawn
	-	-	NCT05151588	Single arm	Phase 2	Locally advanced SMARCB1-deficient sinonasal carcinoma	Tazemetostat	Tazemetostat + Docetaxel + Cisplatin + 5-fluorouracil	Not yet recruiting	-
	-	-	NCT05353439	Single arm	Phase 1	Recurrent SCLC	Tazemetostat	Tazemetostat + Topotecan + Pembrolizumab	2022-07-27	Ongoing
	-	-	NCT06242834	Single arm	Phase 2	Patients in ASCT or CAR T-cell therapy with aggressive B-cell non-Hodgkin's lymphoma	Tazemetostat	Tazemetostat + Pembrolizumab	Not yet recruiting	-
	-	-	NCT05372354	Multiple arm	Phase 1b/2a	R/R MM	Tazemetostat	CC-99282 + Anti-lymphoma agents (including Valemetostat )	2022-10-18	Ongoing
	-	-	NCT04842877	Single arm	Phase 2	R/R B-cell lymphoma	Valemetostat	Valemetostat	2021-06-11	Ongoing
	-	-	NCT06294548	Single arm	Phase 1b/2	Advanced hepatocellular carcinoma	Valemetostat	Valemetostat + Atezolizumab + Bevacizumab	Not yet recruiting	-
	-	-	jRCT2031190268	Single arm	Phase 1	3-29 years old patients with R/R solid tumors	Valemetostat	Valemetostat	2020-03-25	Ongoing
	Ishitsuka	2021	NCT02732275	Single arm	Phase 1	R/R NHL	Valemetostat	Valemetostat	2016-03-31	Ongoing
	-	-	NCT04703192	Single arm	Phase 2	R/R PTCL	Valemetostat	Valemetostat	2021-06-03	Ongoing
	-	-	NCT04102150	Single arm	Phase 2	R/R T-cell leukemia/lymphoma	Valemetostat	Valemetostat	2019-11-21	Ongoing
	-	-	NCT05879484	Single arm	Phase 1/2	PD-L1 positive and HPV-negative R/R HNSCC	Valemetostat	Valemetostat + pembrolizumab	2024-06-17	Not yet recruiting
	-	-	NCT04388852	Single arm	Phase 1b	Metastatic prostate, urothelial and renal cell cancers	Valemetostat	Valemetostat + Ipilimumab	2020-08-20	Ongoing
	-	-	NCT05683171	Single arm	Phase 1/2	R/R FL	Valemetostat	Valemetostat + Rituximab + Lenalidomide	2023-05-19	Ongoing
	-	-	NCT05633979	Single arm	Phase 1	Low/ultra-low HER2-expressing metastatic breast cancer	Valemetostat	Valemetostat + T-DXd	2023-02-09	Ongoing
	-	-	NCT06244485	Single arm	Phase 1b	Advanced solid tumors	Valemetostat	Valemetostat + DXd ADCs	2024-02-16	Ongoing
	-	-	NCT03930953	Multiple arm	Phase 1/2	R/​R NHL	Valemetostat	Arm 1: CC-99282 Alone Arm 2: CC-99282 + Anti-lymphoma agents (including Valemetostat )	2019-05-20	Ongoing
	-	-	NCT06022757	Single arm	Phase 1b/2	Advanced Solid Tumors	XNW5004	XNW5004 + pembrolizumab	2023-09-20	Ongoing
	aTerminated study, but no results published; bThe patients in this study were those who received treatment for more than 2 years in the NCT01897571 study; cWithdrawn study, but no results published; dCompleted study, but no results published. Abbreviation: AML: acute myeloid leukemia; BCL: B-cell lymphoma; CRPC: castration resistant prostate cancer; DLBCL: diffuse large B cell lymphoma; FL: folli…
