# Supplementary figures and images for: Safety profile of EZH2 inhibitors for cancer: a systematic review and meta-analysis
Source: PeerJ journal article supplement (doi:10.7717/peerj.18871), 2025-01-27

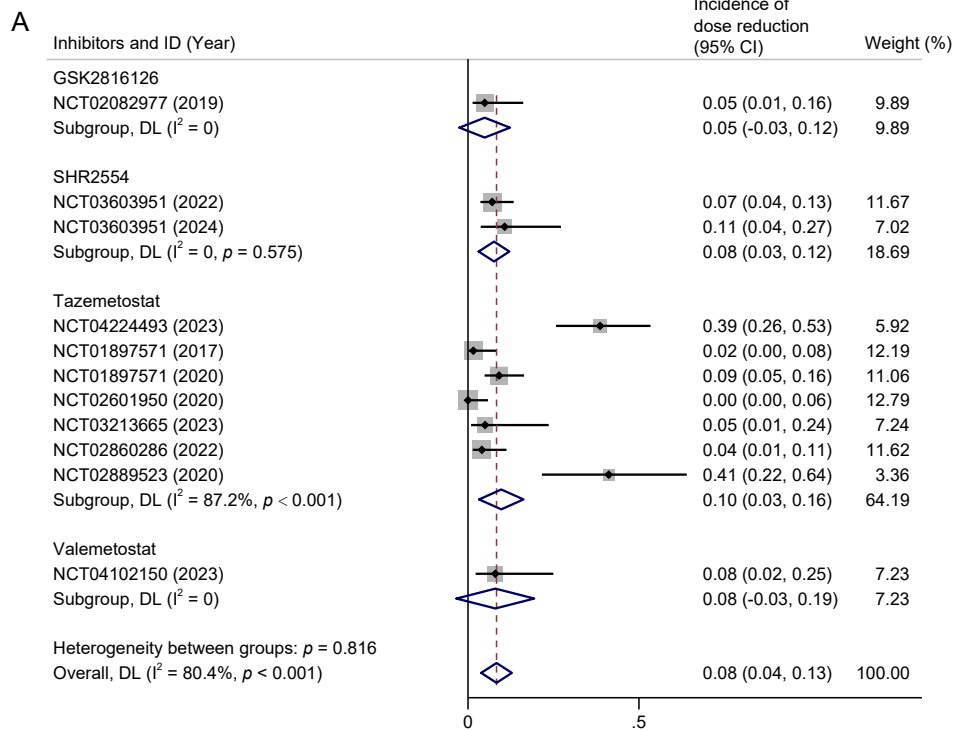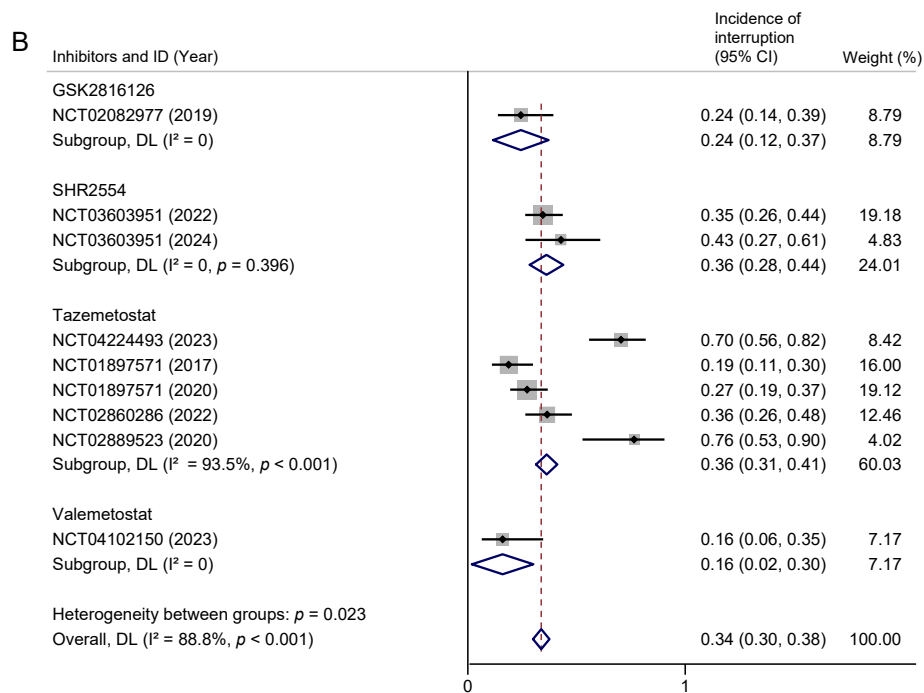

Supplement: SuppFigsTables.zip [file SuppFigsTables.zip]

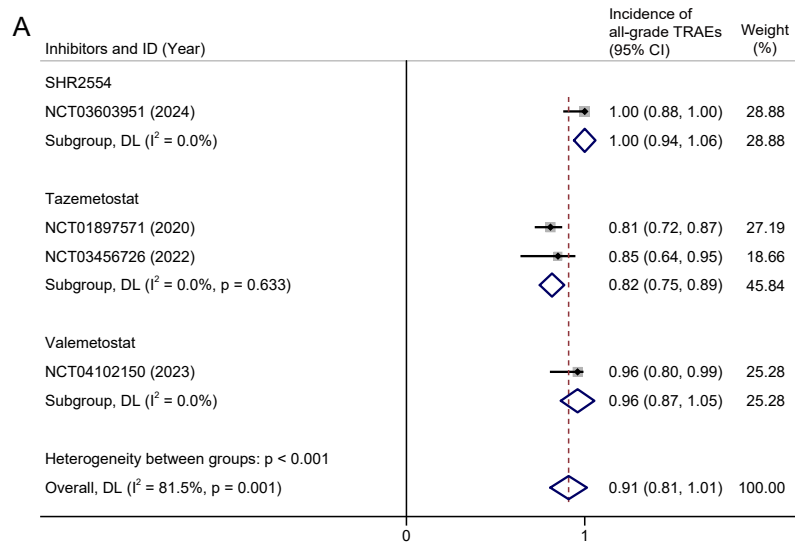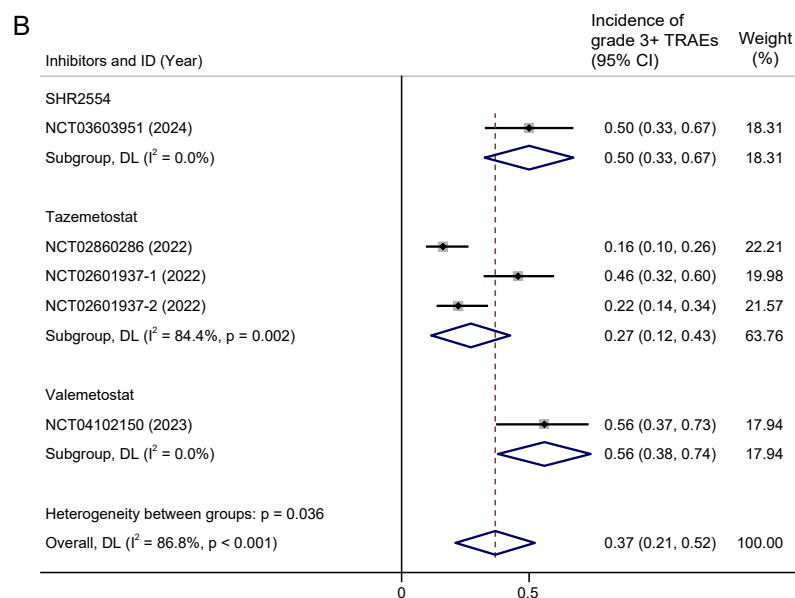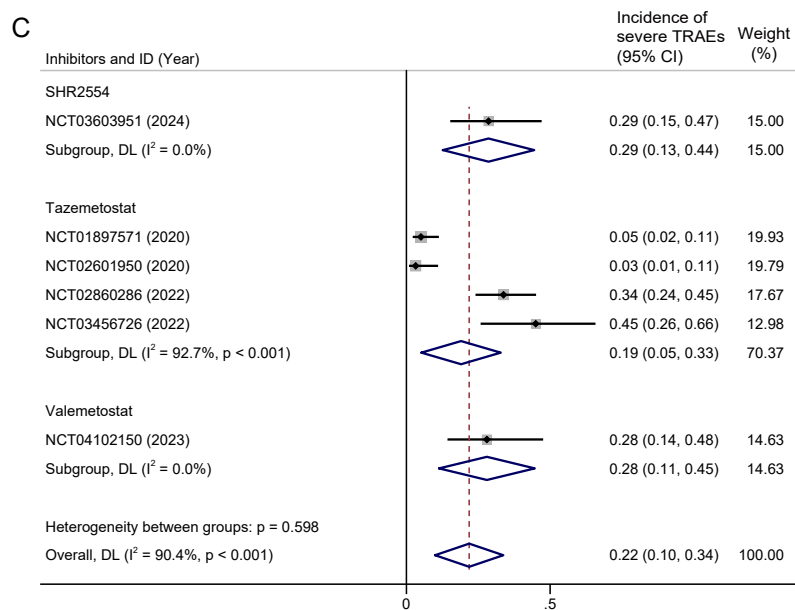

Supplement: SuppFigsTables.zip [file SuppFigsTables.zip]

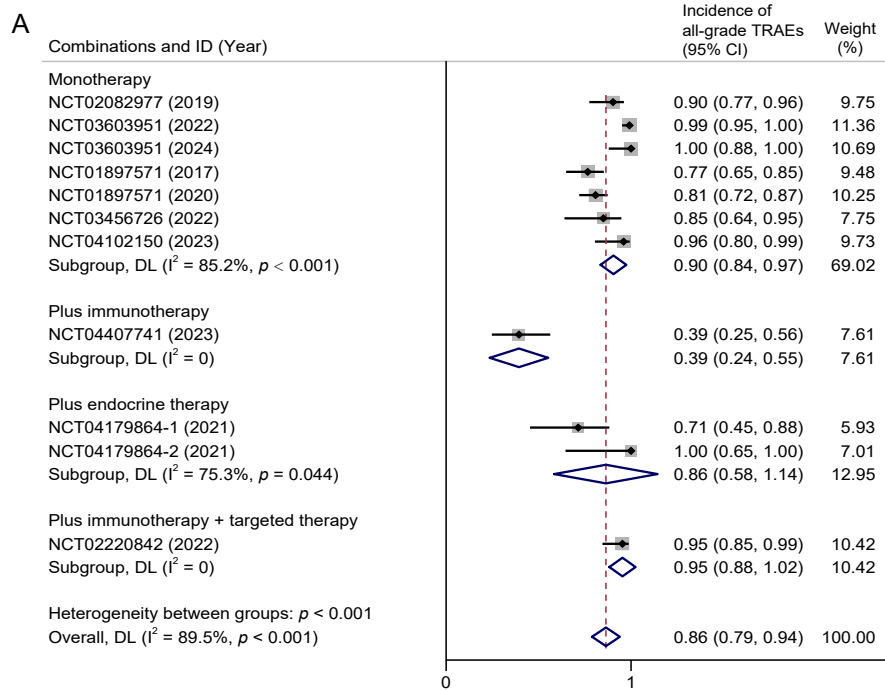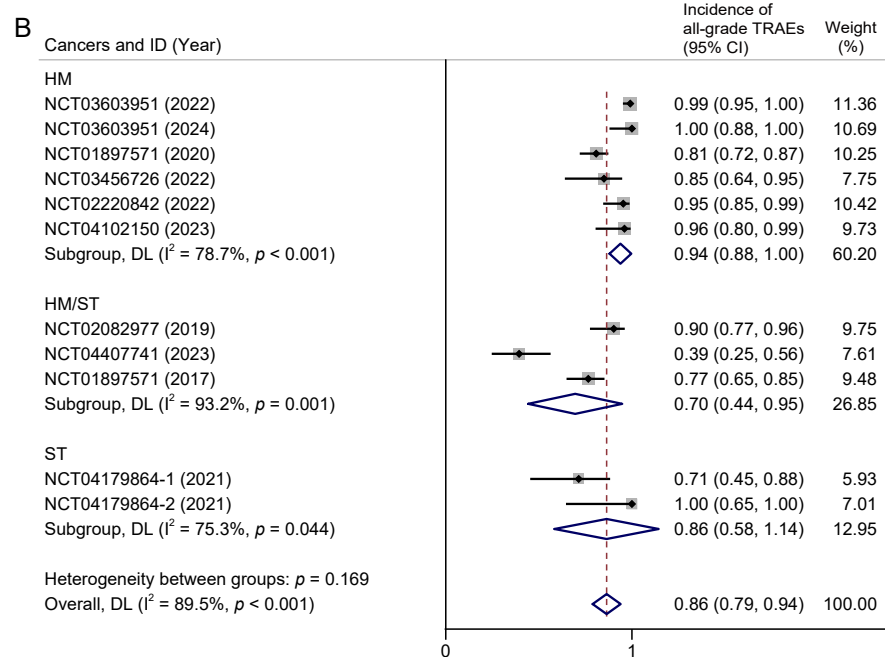

Supplement: SuppFigsTables.zip [file SuppFigsTables.zip]

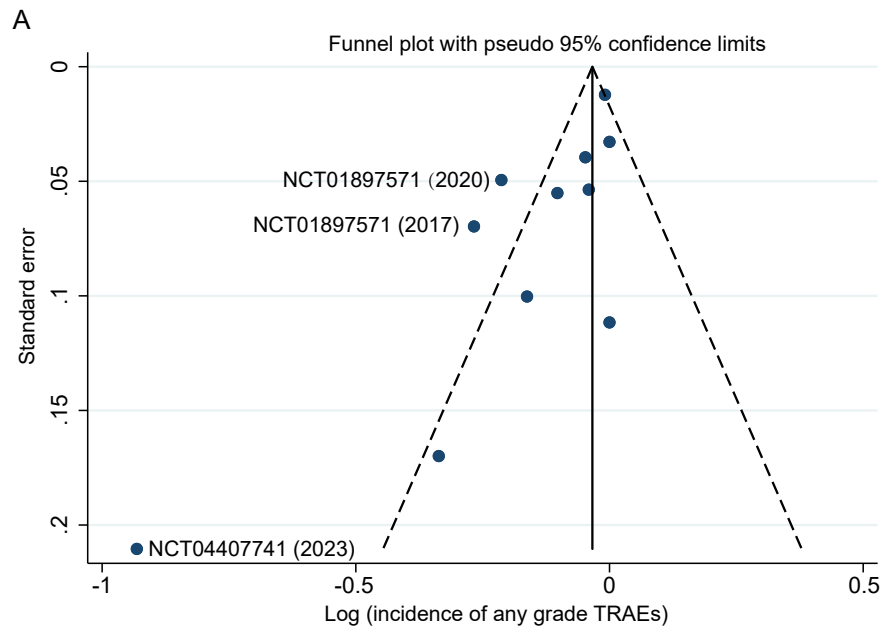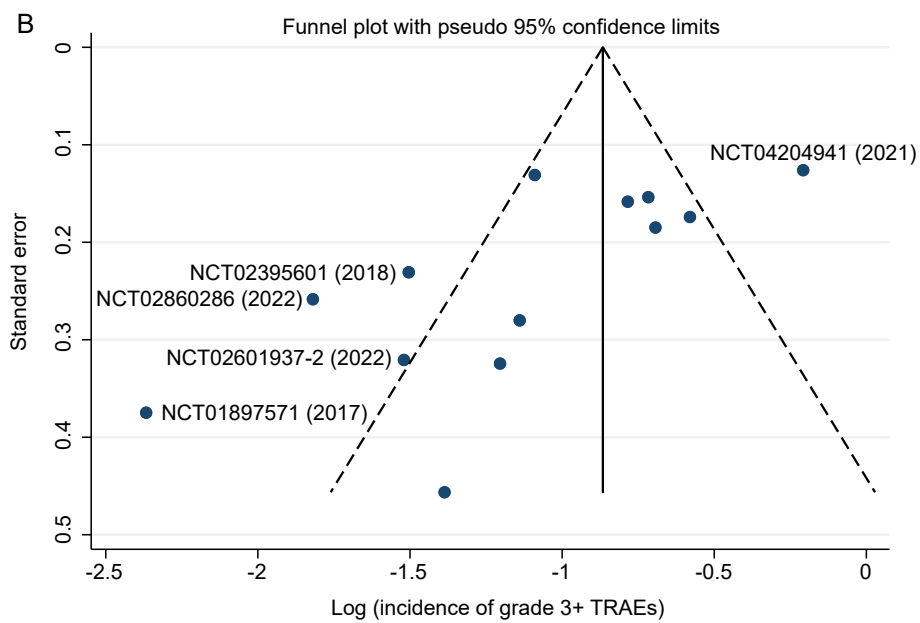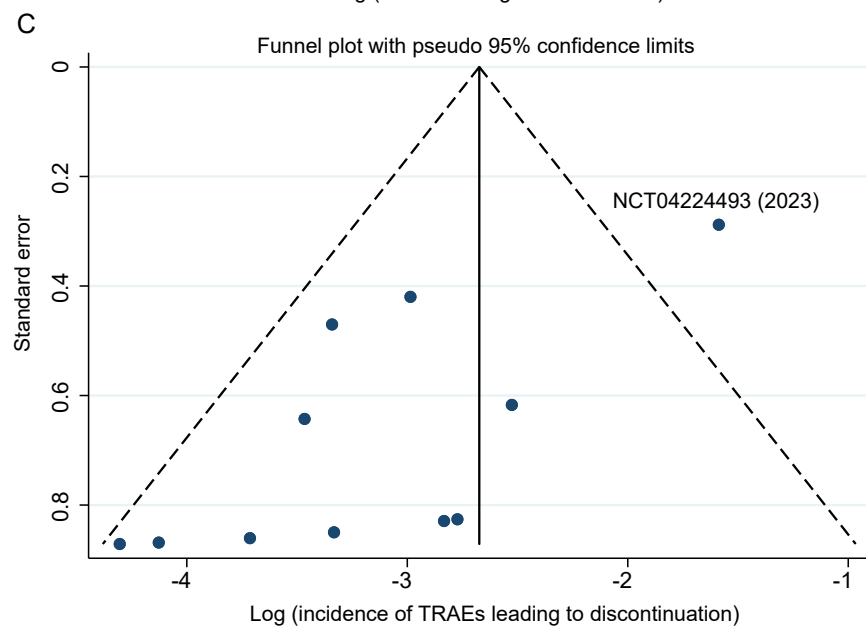

Supplement: SuppFigsTables.zip [file SuppFigsTables.zip]

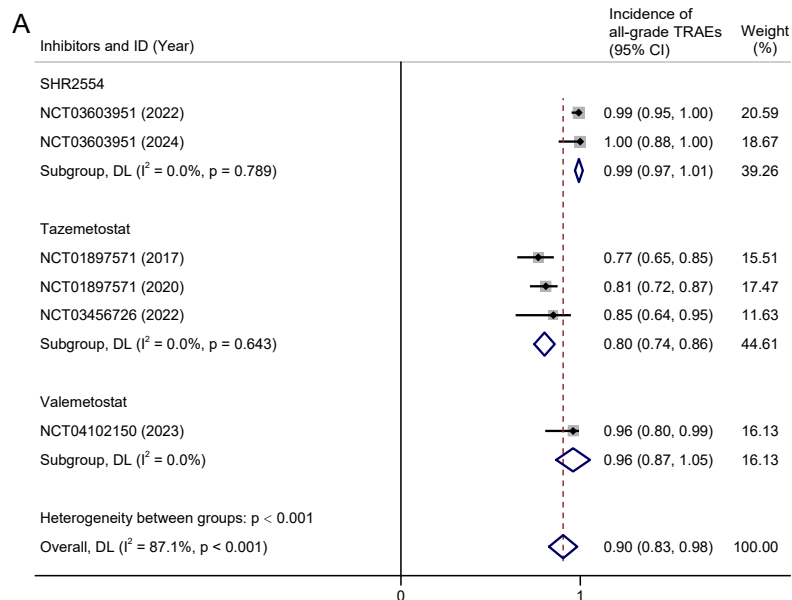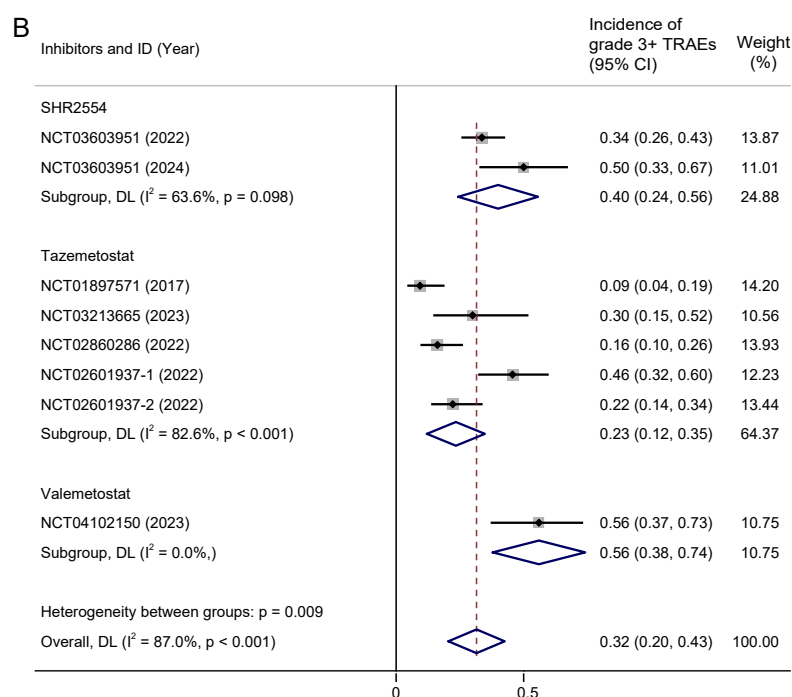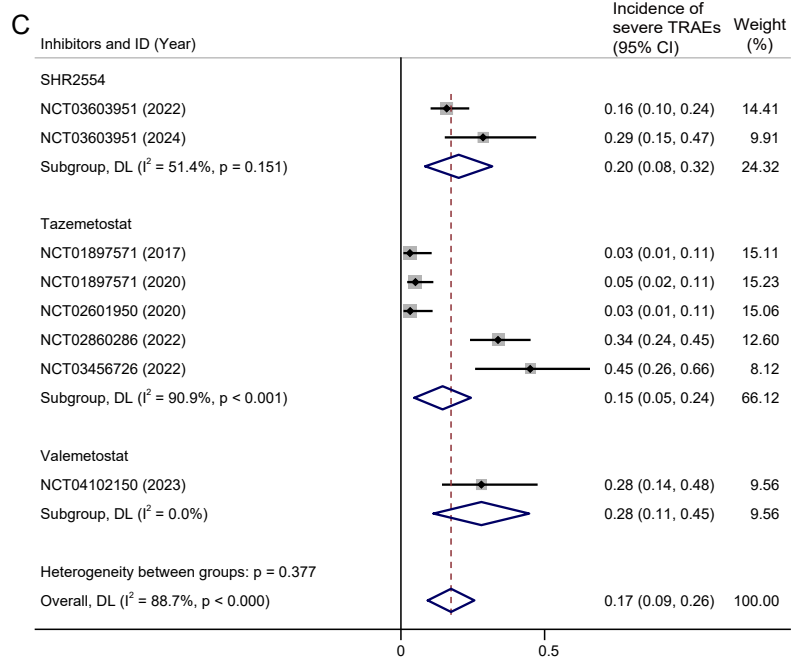

Supplement: SuppFigsTables.zip [file SuppFigsTables.zip]

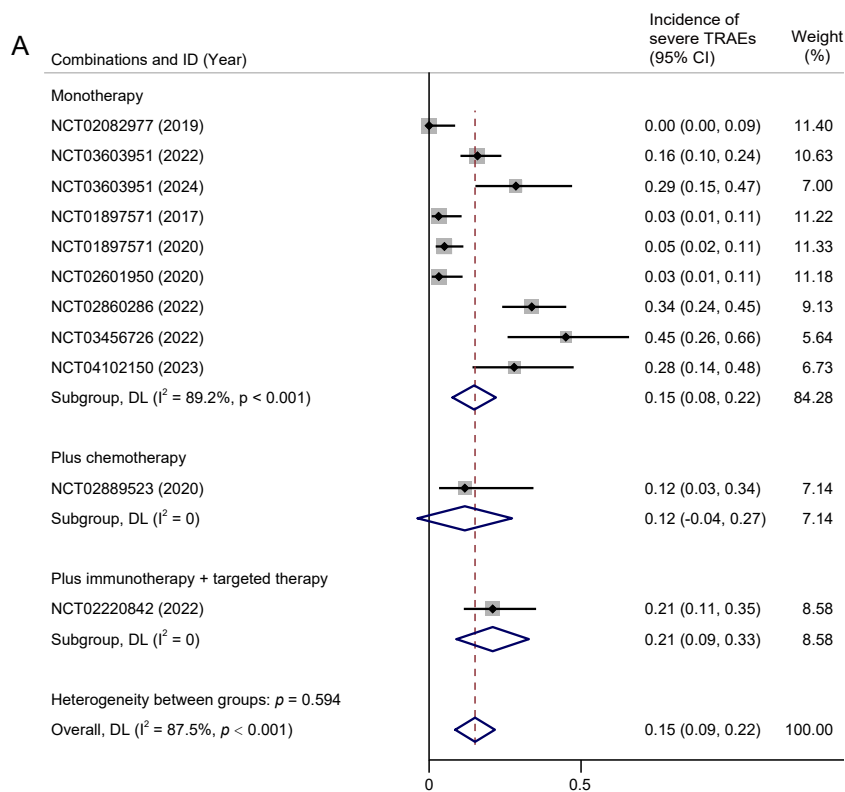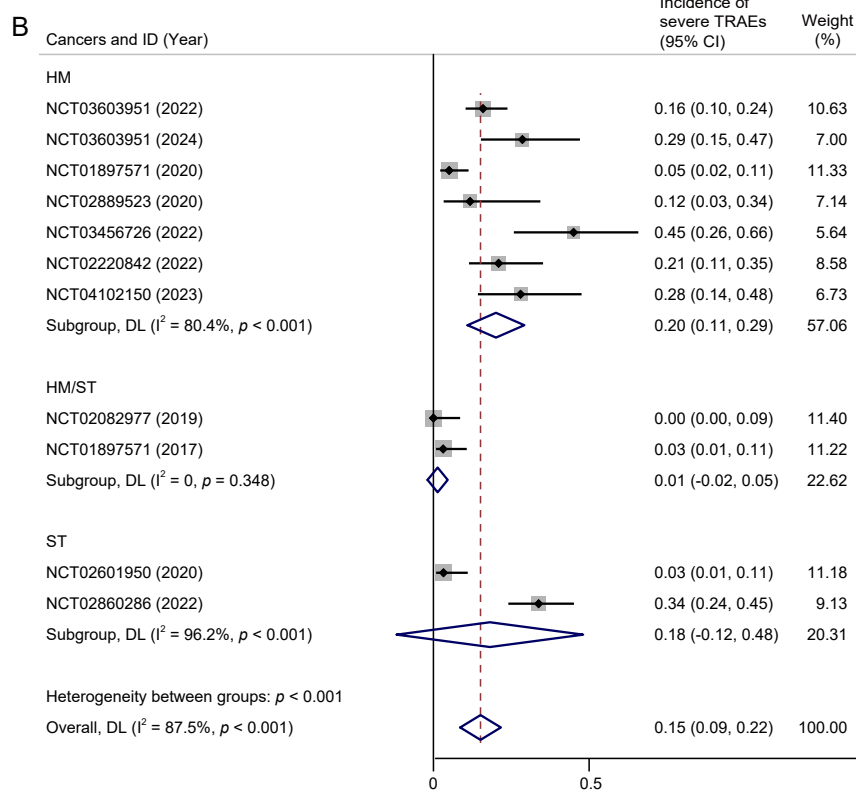

Supplement: SuppFigsTables.zip [file SuppFigsTables.zip]

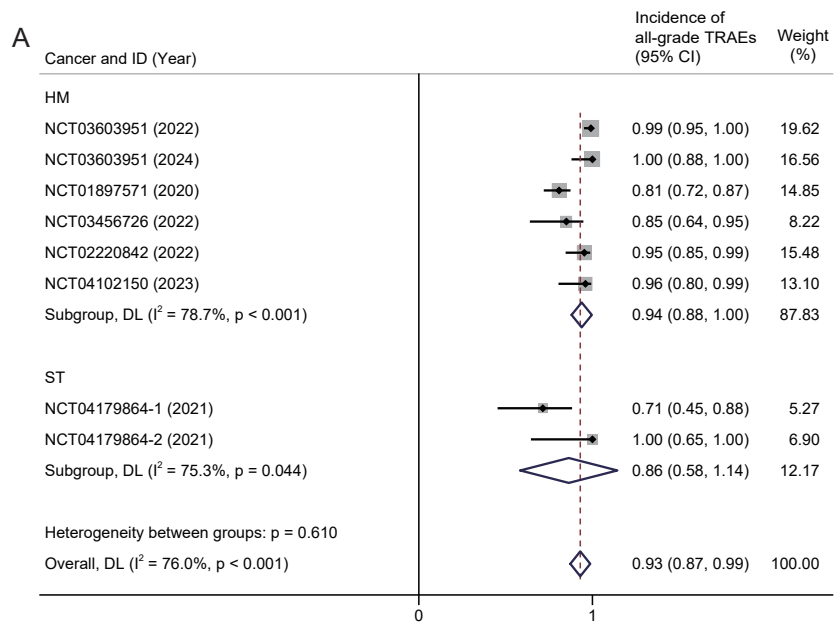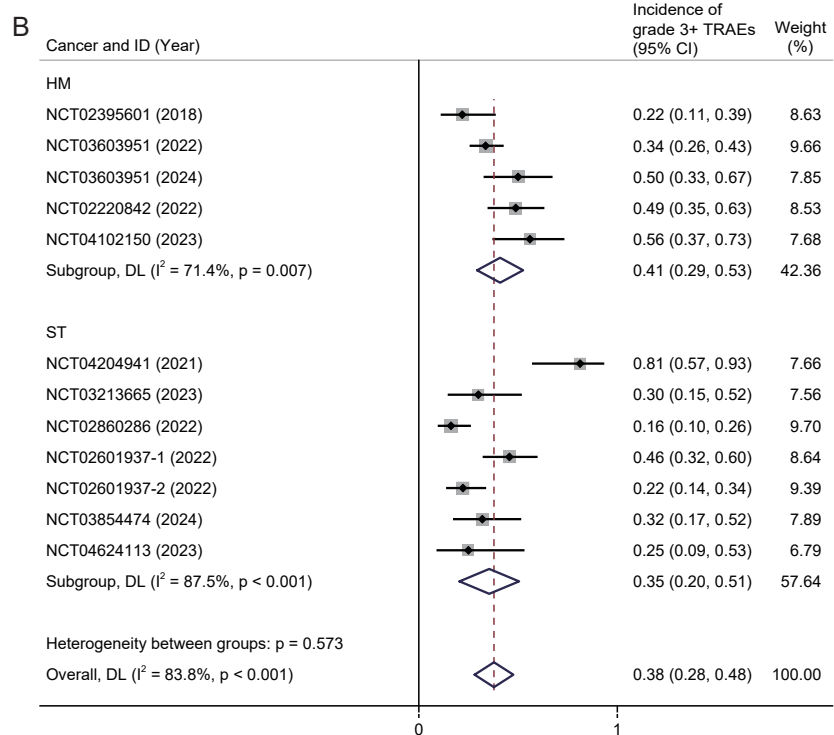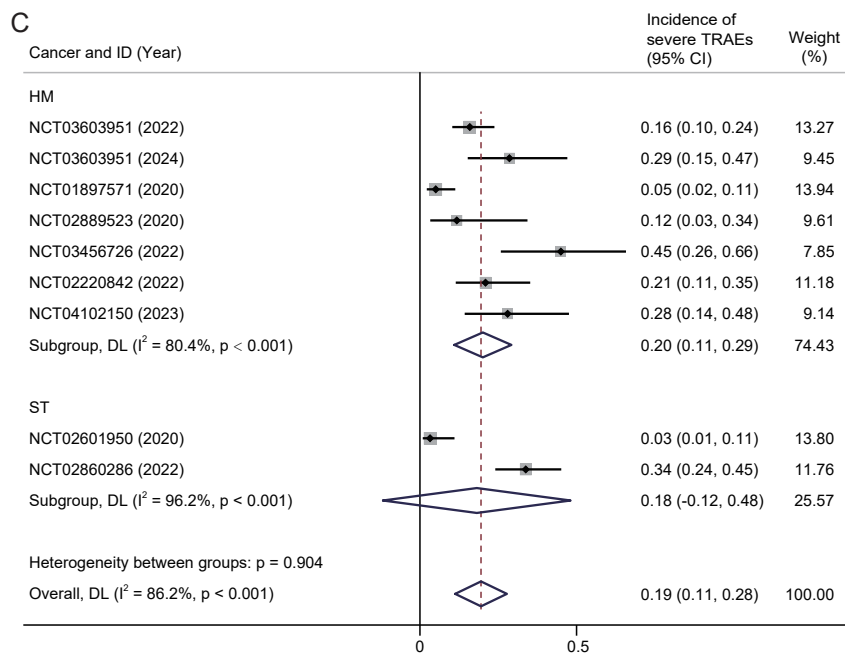

Supplement: SuppFigsTables.zip [file SuppFigsTables.zip]

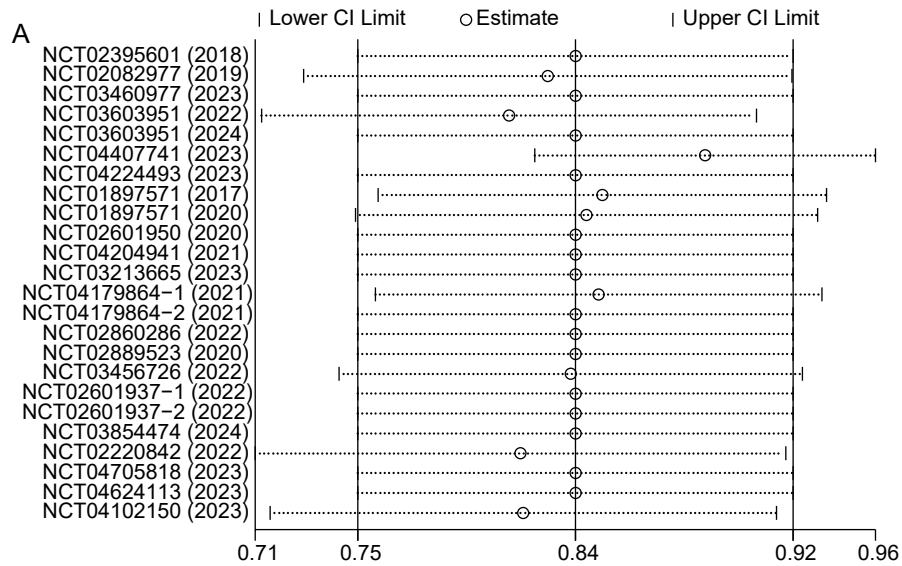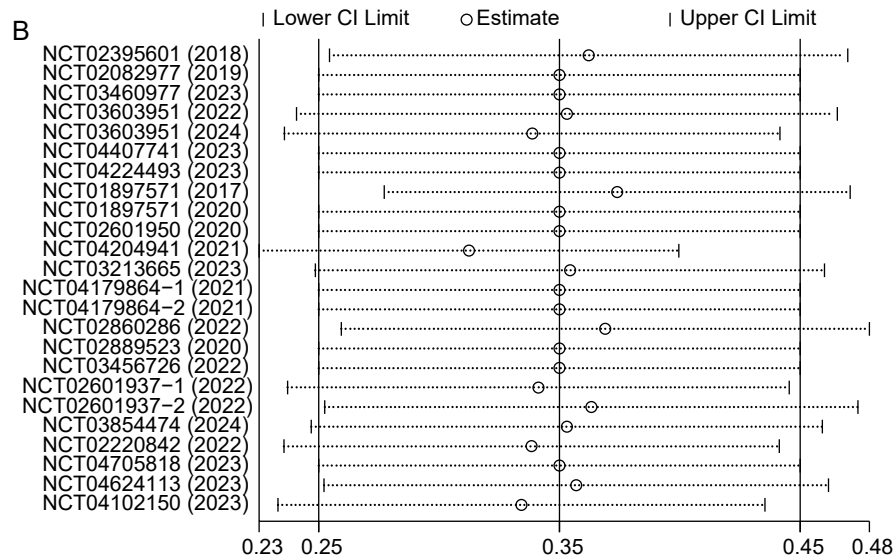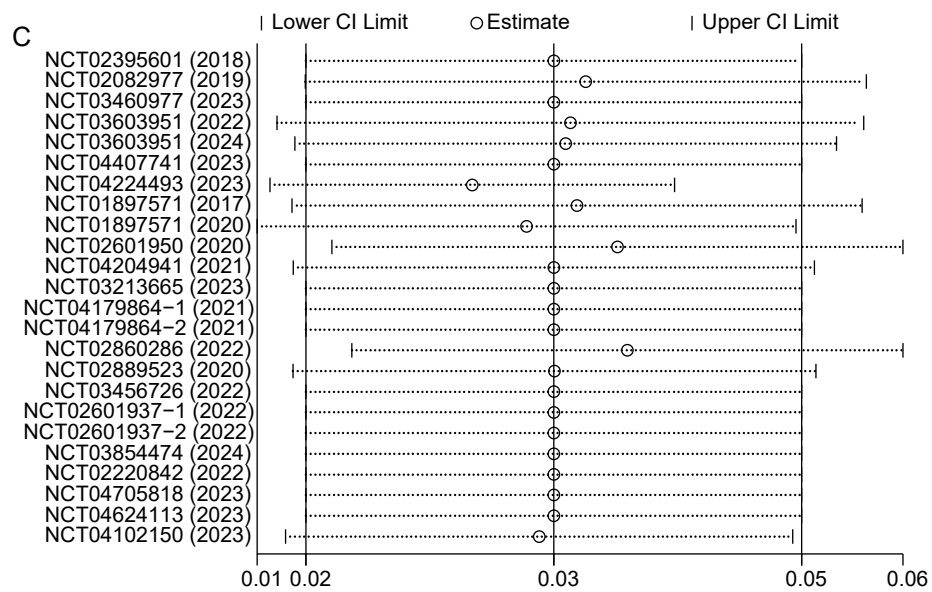

Supplement: SuppFigsTables.zip [file SuppFigsTables.zip]

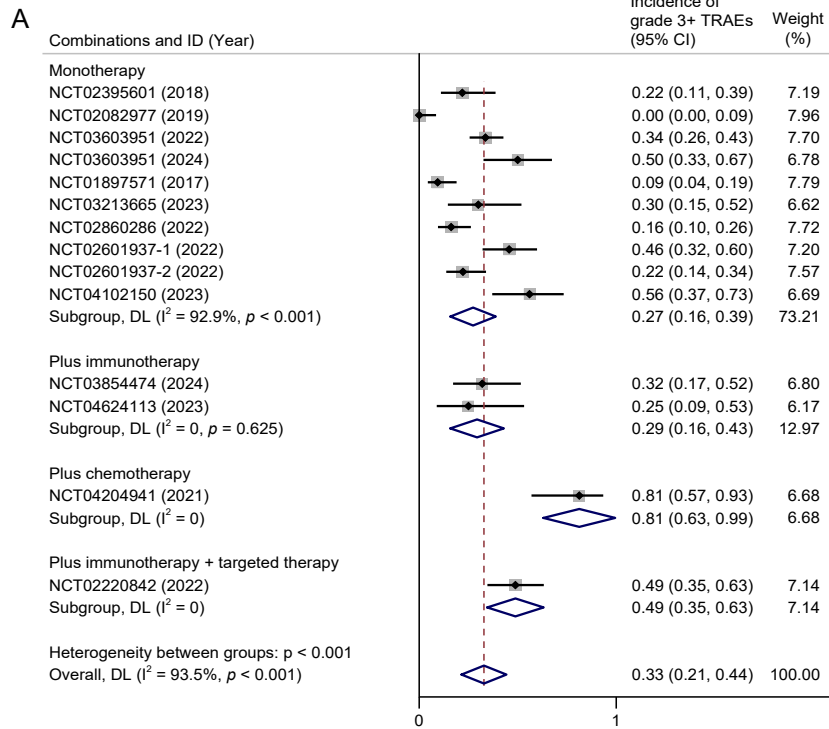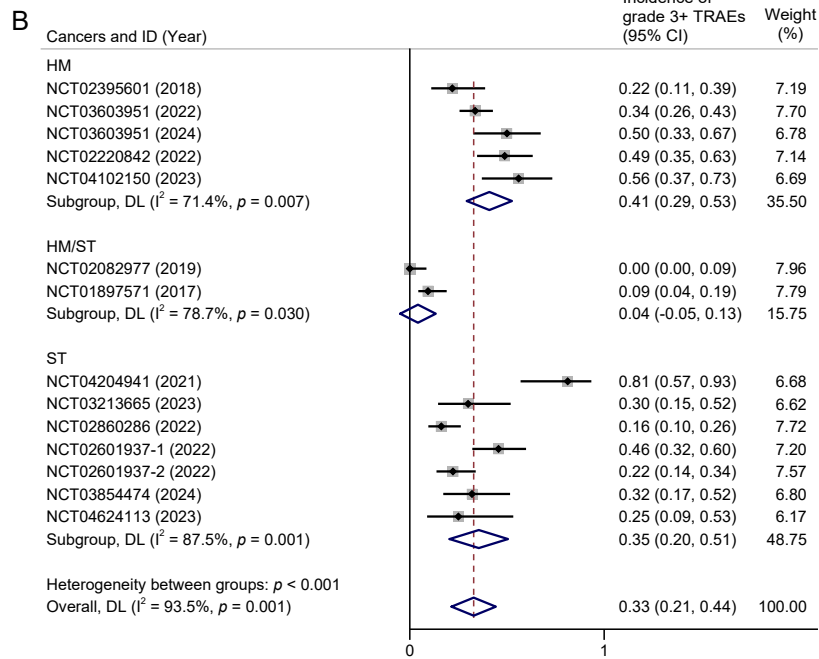

Supplement: SuppFigsTables.zip [file SuppFigsTables.zip]

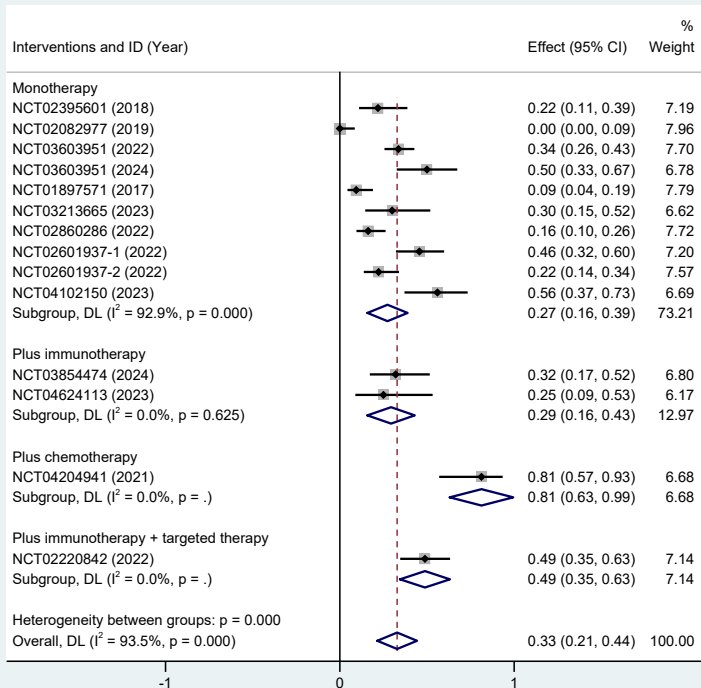

NOTE: Weights and between-subgroup heterogeneity test are from random-effects model

Supplement: supplementary_files_2.zip [file supplementary_files_2.zip]

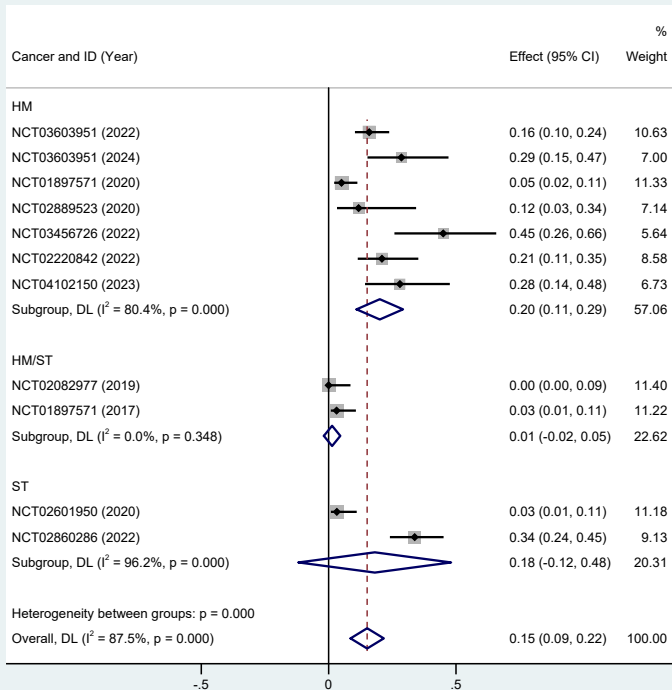

Supplement: supplementary_files_2.zip [file supplementary_files_2.zip]

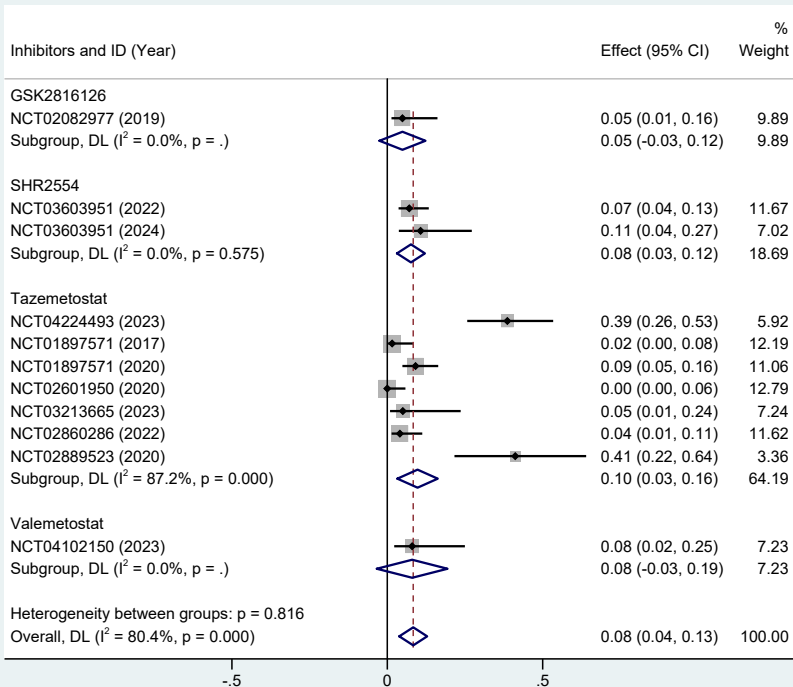

NOTE: Weights and between-subgroup heterogeneity test are from random-effects model

Supplement: supplementary_files_2.zip [file supplementary_files_2.zip]

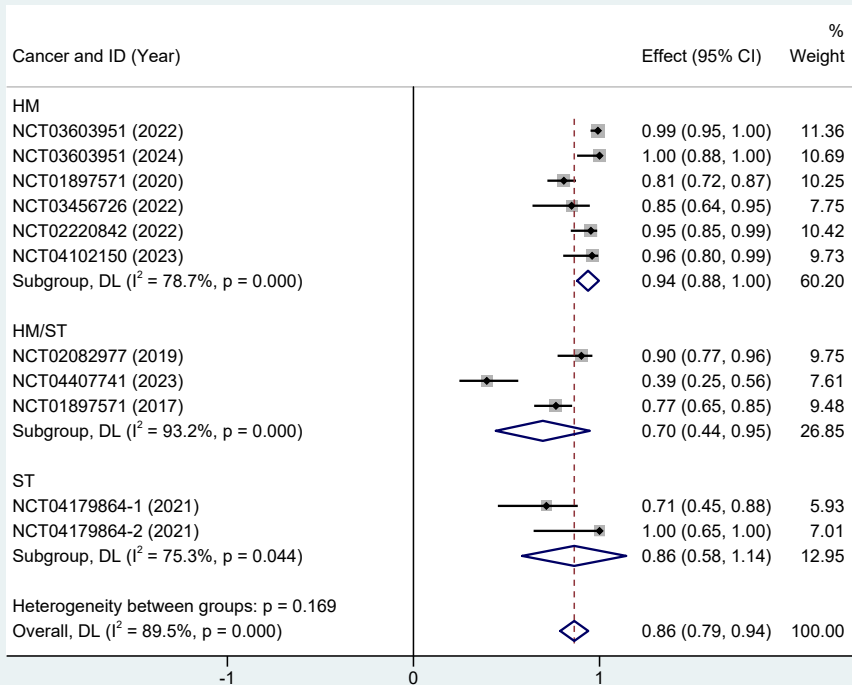

NOTE: Weights and between-subgroup heterogeneity test are from random-effects model

Supplement: supplementary_files_2.zip [file supplementary_files_2.zip]

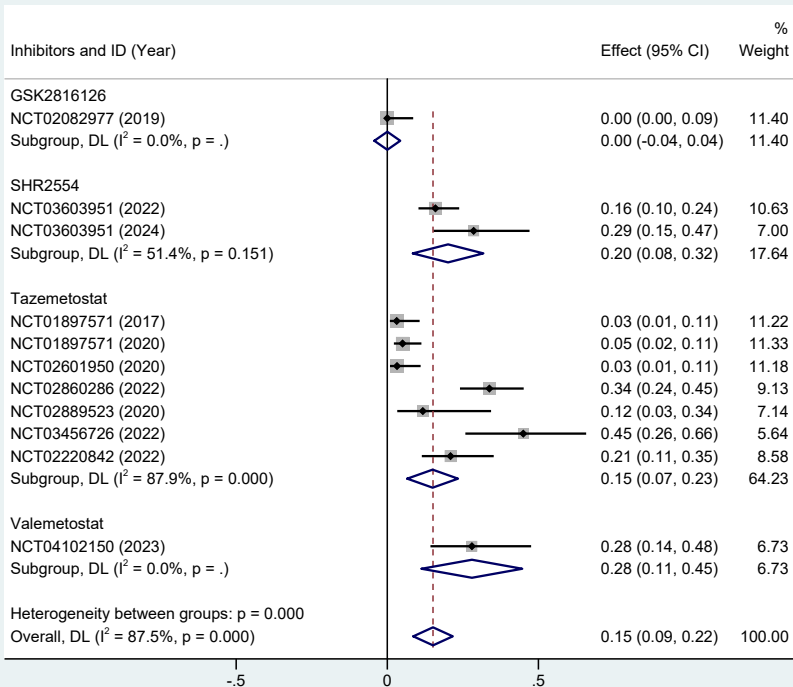

NOTE: Weights and between-subgroup heterogeneity test are from random-effects model

Supplement: supplementary_files_2.zip [file supplementary_files_2.zip]

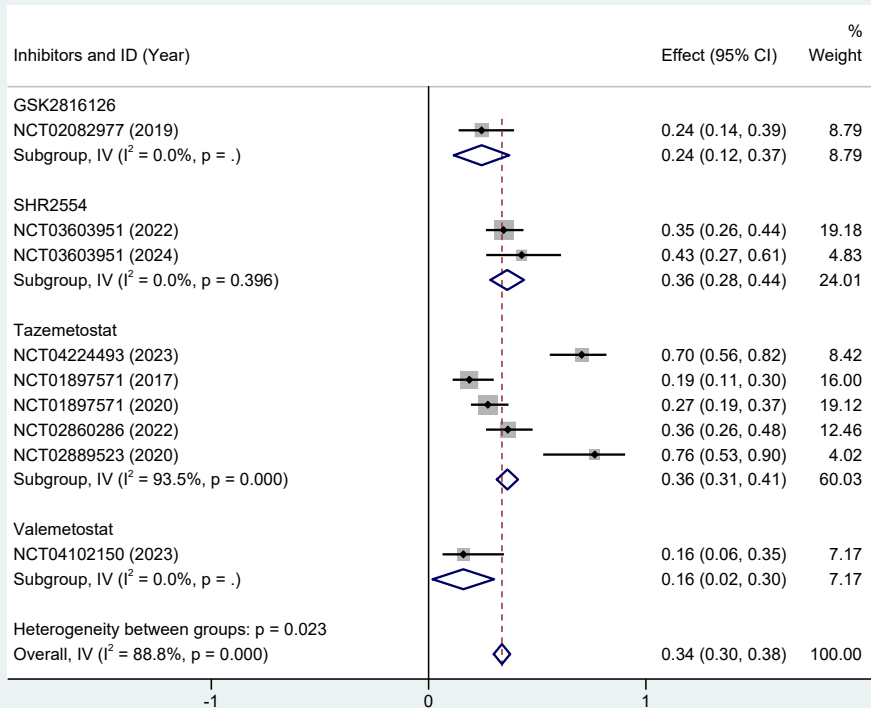

Supplement: supplementary_files_2.zip [file supplementary_files_2.zip]

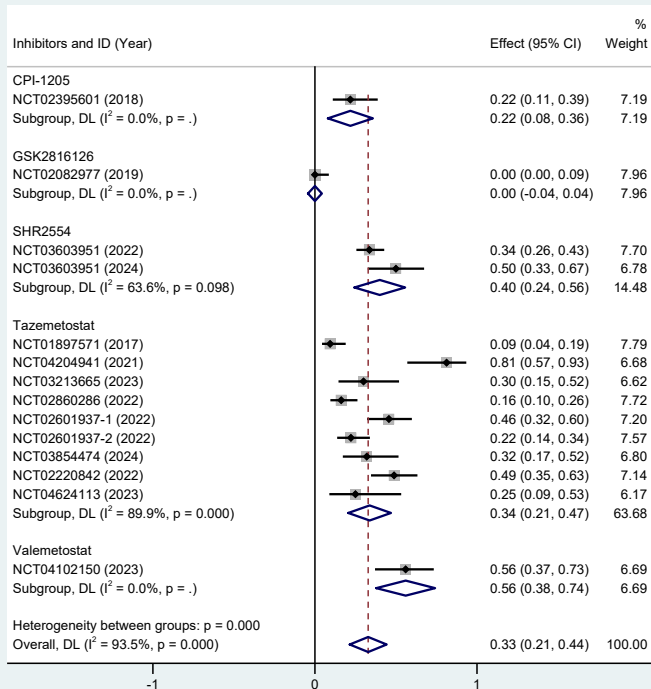

NOTE: Weights and between-subgroup heterogeneity test are from random-effects model

Supplement: supplementary_files_2.zip [file supplementary_files_2.zip]

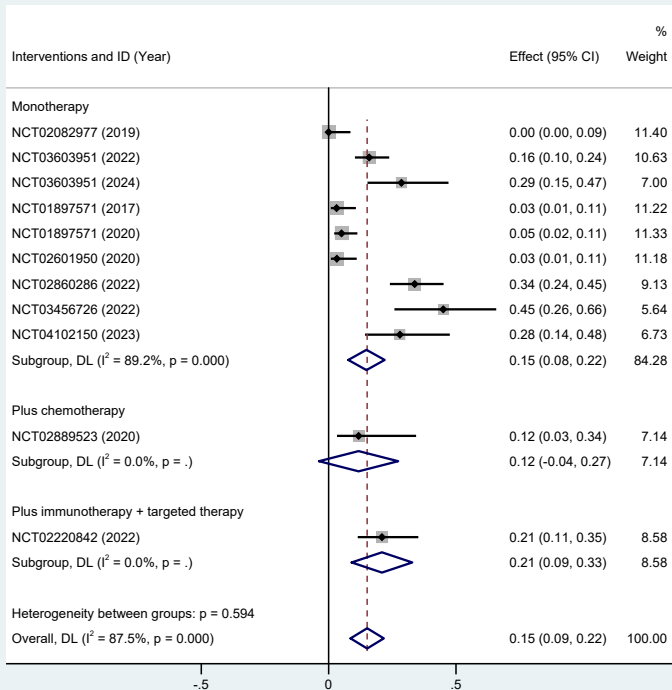

NOTE: Weights and between-subgroup heterogeneity test are from random-effects model

Supplement: supplementary_files_2.zip [file supplementary_files_2.zip]

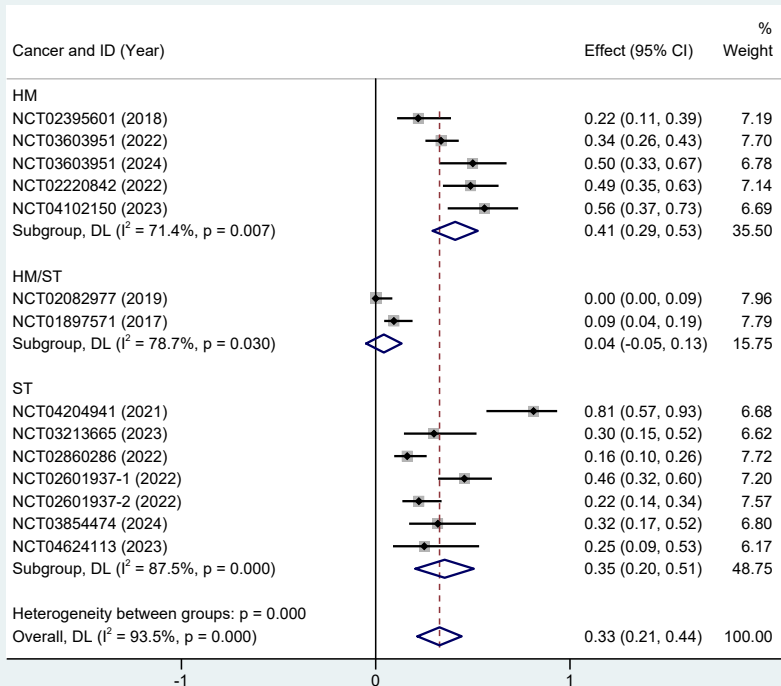

NOTE: Weights and between-subgroup heterogeneity test are from random-effects model

Supplement: supplementary_files_2.zip [file supplementary_files_2.zip]

Funnel plot with pseudo 95% confidence limits

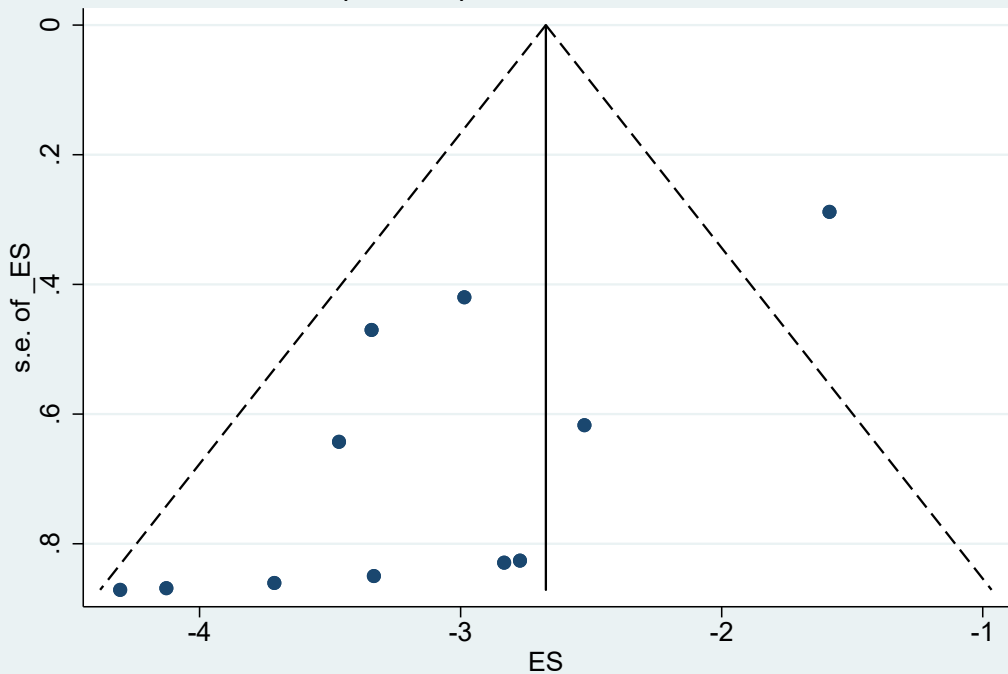

Supplement: supplementary_files_2.zip [file supplementary_files_2.zip]

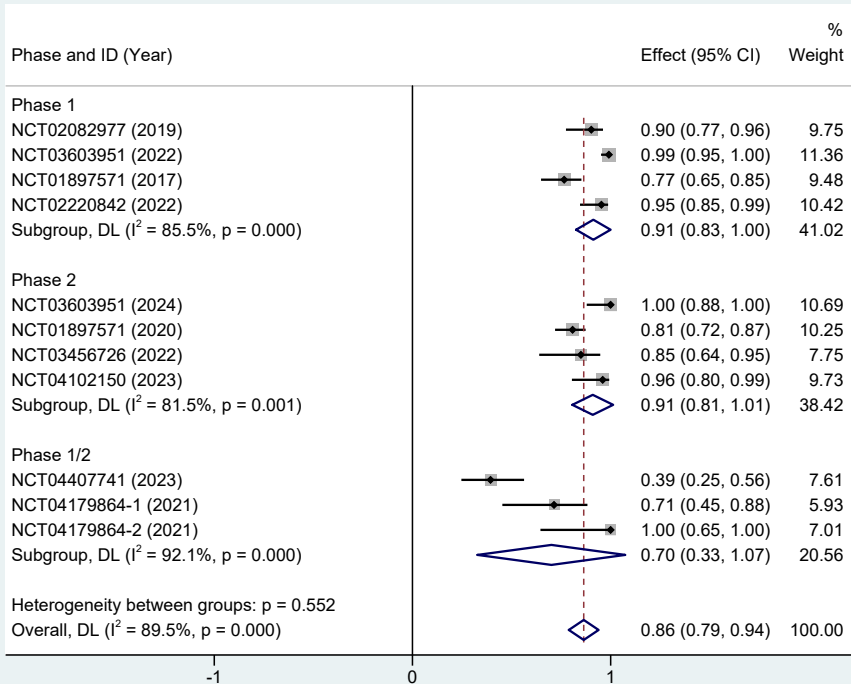

NOTE: Weights and between-subgroup heterogeneity test are from random-effects model

Supplement: supplementary_files_2.zip [file supplementary_files_2.zip]

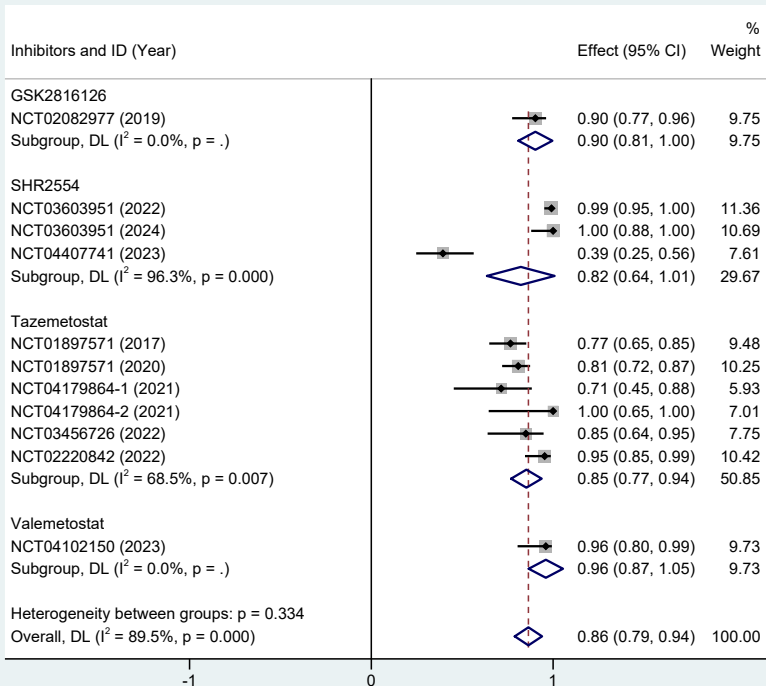

NOTE: Weights and between-subgroup heterogeneity test are from random-effects model

Supplement: supplementary_files_2.zip [file supplementary_files_2.zip]

Funnel plot with pseudo 95% confidence limits

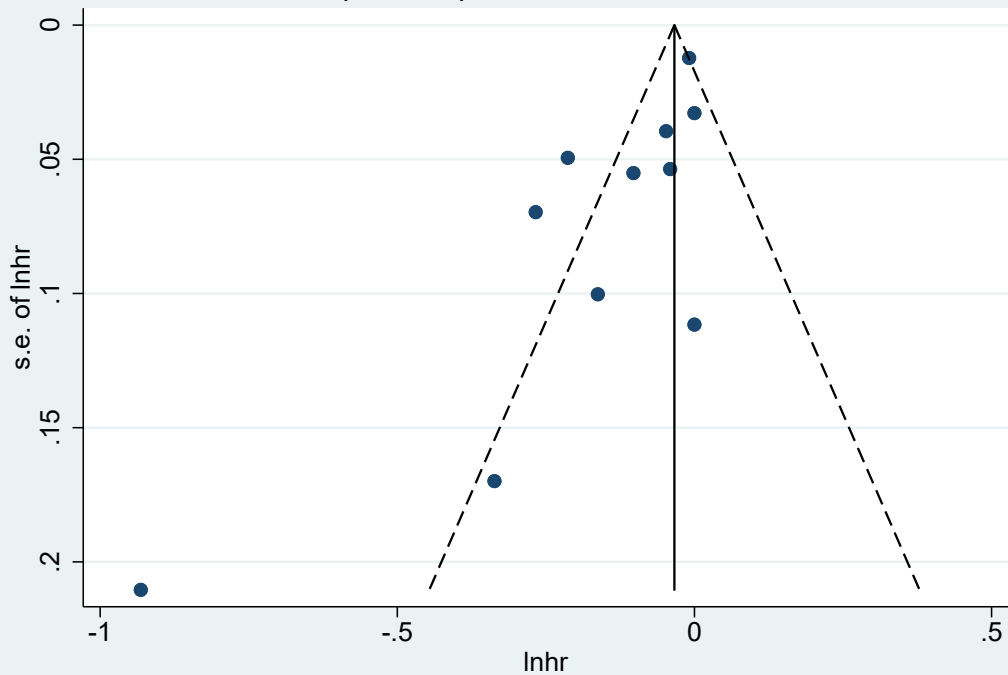

Supplement: supplementary_files_2.zip [file supplementary_files_2.zip]

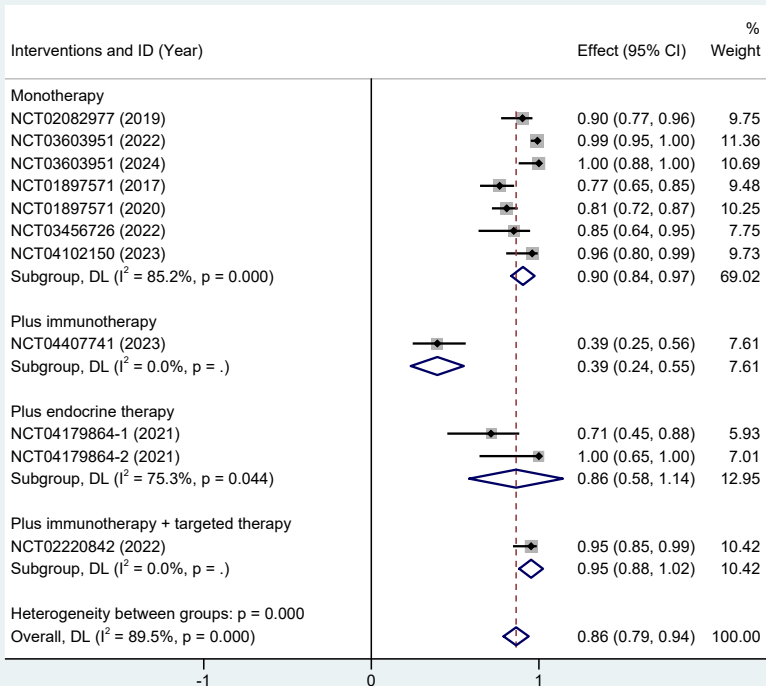

NOTE: Weights and between-subgroup heterogeneity test are from random-effects model

Supplement: supplementary_files_2.zip [file supplementary_files_2.zip]

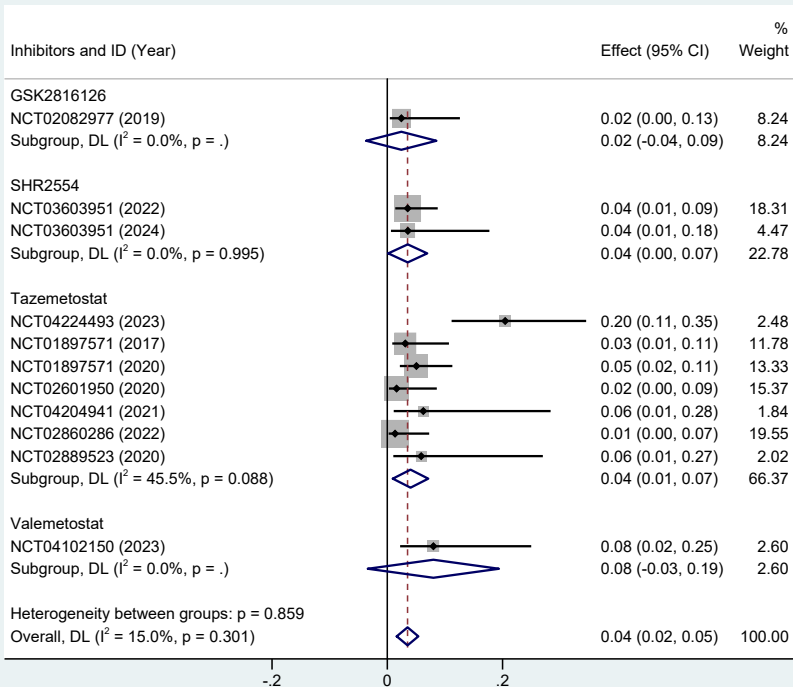

NOTE: Weights and between-subgroup heterogeneity test are from random-effects model

Supplement: supplementary_files_2.zip [file supplementary_files_2.zip]

Funnel plot with pseudo 95% confidence limits

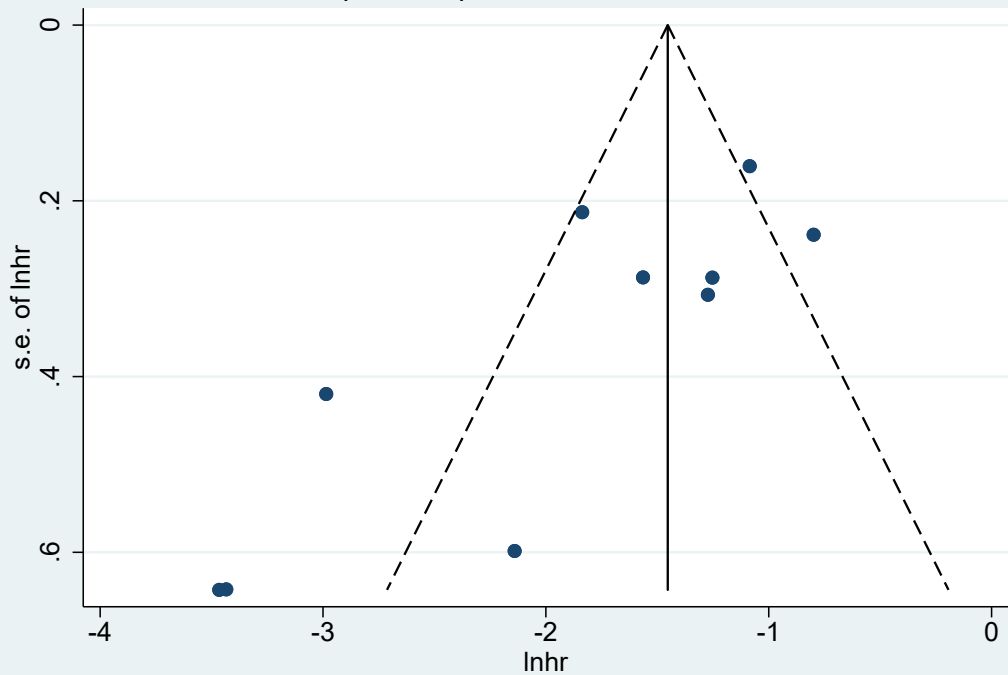

Supplement: supplementary_files_2.zip [file supplementary_files_2.zip]
